# Supplementary material for: Serum Lipids During 20 Years in the Tehran Lipid and Glucose Study: Prevalence, Trends and Impact on Non-Communicable Diseases
Source: PubMed Central journal article supplement — Int J Endocrinol Metab. 2018 Oct 16;16(4 Suppl):e84750. doi: 10.5812/ijem.84750 (PMC6289304; doi:10.5812/ijem.84750), 2018-10-16
Supplement: ijem-16-suppl04-84750-s001.pdf [file ijem-16-suppl04-84750-s001.pdf]

**Appendix 1.** Distribution of serum TC, TG, LDL-C and HDL-C levels and prevalence of high risk levels<sup>a</sup> of each lipid component by age and gender among children and adolescents

|              | Age groups (year) | Mean level (mmol/L) |        |      | Prevalence of high risk level (%) |        |     |
|--------------|-------------------|---------------------|--------|------|-----------------------------------|--------|-----|
|              |                   | Male                | Female | All  | Male                              | Female | All |
| <b>TC</b>    | <b>3-6</b>        | 4.40                | 4.50   | 4.45 | 14                                | 19     | 16  |
|              | <b>7-10</b>       | 4.42                | 4.63   | 4.53 | 15                                | 21     | 17  |
|              | <b>11-13</b>      | 4.40                | 4.47   | 4.45 | 17                                | 18     | 18  |
|              | <b>14-16</b>      | 4.19                | 4.40   | 4.29 | 12                                | 14     | 13  |
|              | <b>17-19</b>      | 4.22                | 4.40   | 4.32 | 13                                | 18     | 16  |
|              | <b>Total</b>      | 4.32                | 4.47   | 4.40 | 14                                | 18     | 16  |
| <b>TG</b>    | <b>3-6</b>        | 0.95                | 1.02   | 0.98 | 3                                 | 3      | 3   |
|              | <b>7-10</b>       | 1.05                | 1.11   | 1.08 | 6                                 | 7      | 7   |
|              | <b>11-13</b>      | 1.19                | 1.45   | 1.32 | 11                                | 19     | 15  |
|              | <b>14-16</b>      | 1.21                | 1.29   | 1.25 | 11                                | 11     | 11  |
|              | <b>17-19</b>      | 1.40                | 1.13   | 1.24 | 16                                | 7      | 11  |
|              | <b>Total</b>      | 1.16                | 1.22   | 1.20 | 10                                | 10     | 10  |
| <b>LDL-C</b> | <b>3-6</b>        | 2.72                | 2.87   | 2.79 | 15                                | 19     | 17  |
|              | <b>7-10</b>       | 2.72                | 2.90   | 2.82 | 14                                | 21     | 18  |
|              | <b>11-13</b>      | 2.69                | 2.72   | 2.69 | 19                                | 16     | 17  |
|              | <b>14-16</b>      | 2.53                | 2.69   | 2.61 | 12                                | 17     | 14  |
|              | <b>17-19</b>      | 2.53                | 2.72   | 2.64 | 13                                | 19     | 17  |
|              | <b>Total</b>      | 2.64                | 2.77   | 2.72 | 14                                | 18     | 17  |
| <b>HDL-C</b> | <b>3-6</b>        | 1.22                | 1.16   | 1.19 | 11                                | 12     | 12  |
|              | <b>7-10</b>       | 1.22                | 1.22   | 1.22 | 9                                 | 9      | 9   |
|              | <b>11-13</b>      | 1.19                | 1.11   | 1.14 | 11                                | 17     | 14  |
|              | <b>14-16</b>      | 1.11                | 1.11   | 1.11 | 18                                | 17     | 18  |
|              | <b>17-19</b>      | 1.03                | 1.16   | 1.11 | 21                                | 9      | 14  |
|              | <b>Total</b>      | 1.16                | 1.16   | 1.16 | 14                                | 14     | 14  |

Data were derived from the Azizi *et al.* findings (11).

<sup>a</sup> High risk level was defined as  $\geq 5.2$  mmol/L for TC,  $\geq 90^{\text{th}}$  percentile for TG,  $\geq 3.38$  mmol/L for LDL-C, and  $\leq 10^{\text{th}}$  percentile for HDL-C.

Abbreviations: TC, total cholesterol; TG, triglycerides; LDL-C, low density lipoprotein cholesterol; HDL-C, high density lipoprotein cholesterol.

**Appendix 2.** Distribution of serum TC, TG, LDL-C and HDL-C levels and prevalence of high risk levels<sup>a</sup> of each lipid component by age and gender among adults

|              | Age groups<br>(year) | Mean level (mmol/L) |        |      | Prevalence of high risk level (%) |        |     |
|--------------|----------------------|---------------------|--------|------|-----------------------------------|--------|-----|
|              |                      | Male                | Female | All  | Male                              | Female | All |
| <b>TC</b>    | <b>&lt;25</b>        | 4.47                | 4.58   | 4.53 | 4                                 | 6      | NA  |
|              | <b>25-34</b>         | 5.07                | 5.02   | 5.04 | 13                                | 11     | NA  |
|              | <b>35-44</b>         | 5.51                | 5.38   | 5.43 | 25                                | 20     | NA  |
|              | <b>45-54</b>         | 5.56                | 6.05   | 5.87 | 24                                | 43     | NA  |
|              | <b>55-64</b>         | 5.72                | 6.52   | 6.21 | 32                                | 56     | NA  |
|              | <b>Total</b>         | 5.33                | 5.51   | 5.43 | 20                                | 26     | 24  |
| <b>TG</b>    | <b>&lt;25</b>        | 1.33                | 1.17   | 1.23 | 13                                | 6      | NA  |
|              | <b>25-34</b>         | 2.03                | 1.47   | 1.67 | 33                                | 14     | NA  |
|              | <b>35-44</b>         | 2.40                | 1.85   | 2.07 | 37                                | 27     | NA  |
|              | <b>45-54</b>         | 2.27                | 2.25   | 2.26 | 38                                | 38     | NA  |
|              | <b>55-64</b>         | 2.27                | 2.37   | 2.33 | 36                                | 43     | NA  |
|              | <b>Total</b>         | 2.15                | 1.83   | 1.95 | 33                                | 26     | 28  |
| <b>LDL-C</b> | <b>&lt;25</b>        | 2.77                | 2.84   | 2.82 | 6                                 | 7      | NA  |
|              | <b>25-34</b>         | 3.15                | 3.15   | 3.15 | 13                                | 13     | NA  |
|              | <b>35-44</b>         | 3.44                | 3.41   | 3.41 | 23                                | 20     | NA  |
|              | <b>45-54</b>         | 3.54                | 3.85   | 3.75 | 24                                | 38     | NA  |
|              | <b>55-64</b>         | 3.65                | 4.24   | 4.01 | 30                                | 49     | NA  |
|              | <b>Total</b>         | 3.34                | 3.49   | 3.44 | 20                                | 24     | 23  |
| <b>HDL-C</b> | <b>&lt;25</b>        | 1.06                | 1.19   | 1.14 | 22                                | 11     | NA  |
|              | <b>25-34</b>         | 0.98                | 1.19   | 1.11 | 32                                | 12     | NA  |
|              | <b>35-44</b>         | 0.98                | 1.14   | 1.06 | 33                                | 16     | NA  |
|              | <b>45-54</b>         | 0.98                | 1.16   | 1.11 | 32                                | 13     | NA  |
|              | <b>55-64</b>         | 1.03                | 1.22   | 1.14 | 23                                | 12     | NA  |
|              | <b>Total</b>         | 1.01                | 1.16   | 1.11 | 30                                | 13     | 19  |

Data were derived from the Azizi *et al.* findings (13).

<sup>a</sup> High risk level was defined as  $\geq 6.19$  mmol/L for TC,  $\geq 2.26$  mmol/L for TG,  $\geq 4.14$  mmol/L for LDL-C, and  $< 0.91$  mmol/L for HDL-C.

Abbreviations: TC, total cholesterol; TG, triglycerides; LDL-C, low density lipoprotein cholesterol; HDL-C, high density lipoprotein cholesterol; NA, not available.
